# Supplementary material for: Synthesis, characterization and in vitro cytotoxicity of gold(iii) dialkyl/diaryldithiocarbamato complexes
Source: Royal Society of Chemistry journal article supplement (doi:10.1039/c5ra15123f), 2015-01-01
Supplement: c5ra15123f1.pdf [file c5ra15123f1.pdf]

## Supplementary materials

for

### Synthesis, characterization and *in vitro* cytotoxicity of gold(III) dialkyl/diaryldithiocarbamate complexes

Muhammad Altaf,<sup>a</sup> Anvarhusein A. Isab,<sup>b\*</sup> Ján Vančo,<sup>c</sup> Zdeněk Dvořák,<sup>c</sup> and Zdeněk

Trávníček<sup>c\*</sup>, Helen Stoeckli-Evans<sup>d</sup>

#### Table of contents:

**Figure S1:** The results of mass spectrometry study of interactions of complex **3** with physiological levels of L-cysteine (Cys) and reduced L-glutathione (GSH).

**Figure S2:** The Uv/Vis spectra of complexes **3** (blue line) and **4** (red line) in MeOH.

**Figure S3:** The Uv/Vis spectra of complexes **3** (blue line) and **4** (red line) in DMF.

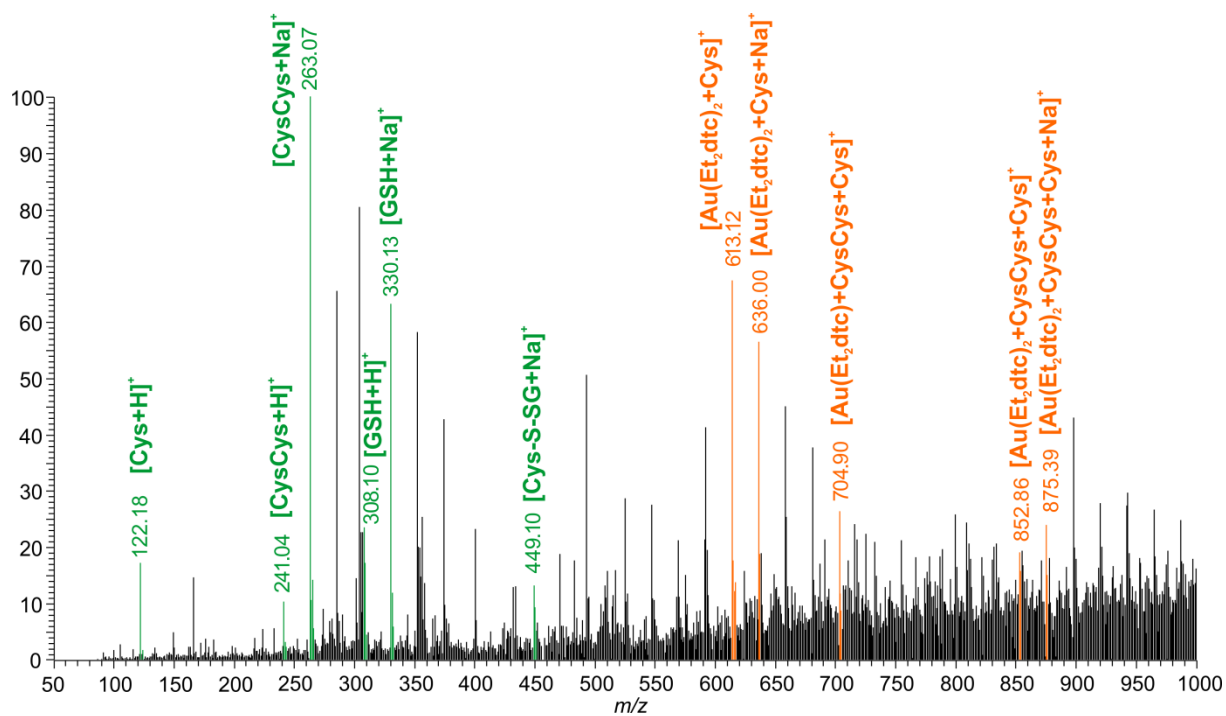

**Figure S1:** The results of mass spectrometry study of interactions of complex **3** with physiological levels of L-cysteine (Cys) and reduced L-glutathione (GSH). Cystine (Cys-Cys) represents an oxidation product of cysteine. The peaks of Cys and GSH and their oxidized products are highlighted in green colour, while the peaks corresponding to the interaction adducts of complex **3** are given in orange colour.

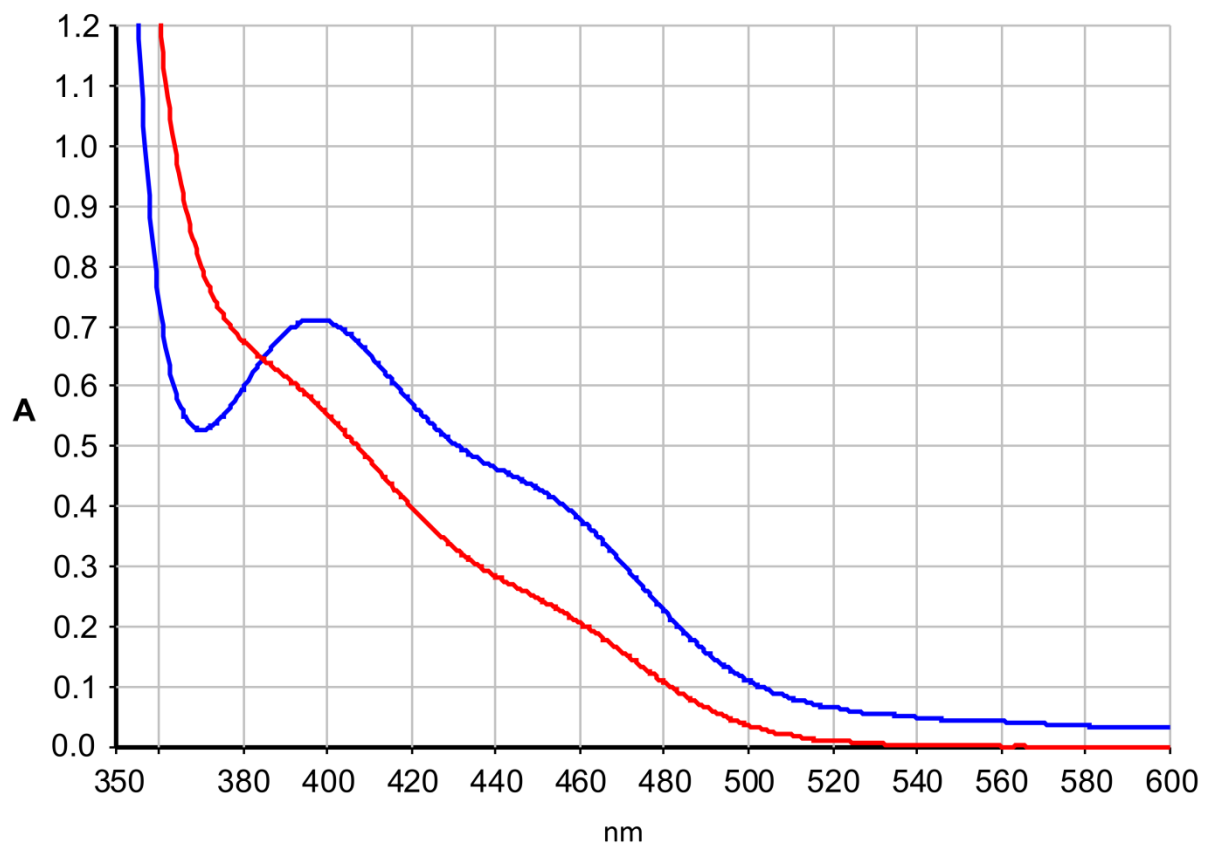

**Figure S2:** The Uv/Vis spectra of complexes **3** (blue line) and **4** (red line) in MeOH.

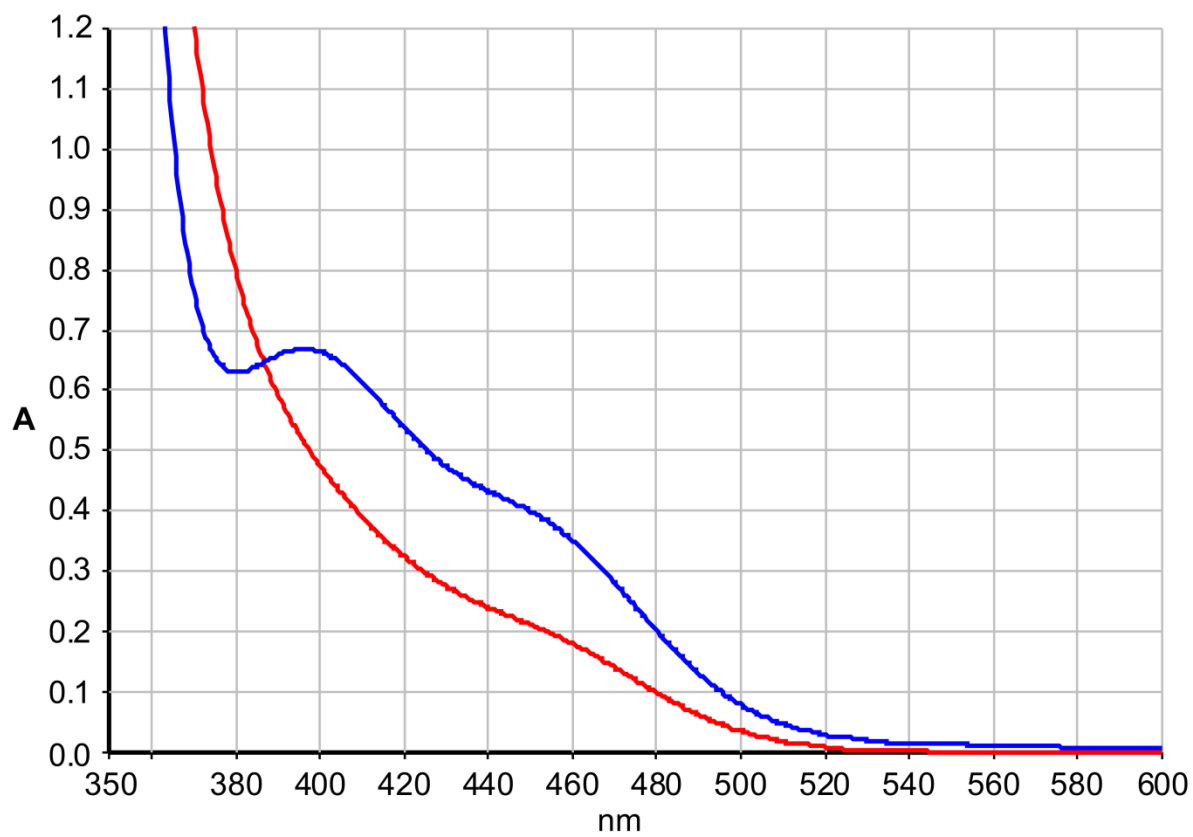

**Figure S3:** The Uv/Vis spectra of complexes **3** (blue line) and **4** (red line) in DMF.
